# Supplementary material for: Las autorizaciones de trabajo de los trabajadores extranjeros no comunitarios
Source: Royal Society of Chemistry journal article supplement (doi:10.1039/d3dt03018k), 2005-01-01
Supplement: d3dt03018k1.pdf [file d3dt03018k1.pdf]

## Electronic Supplementary Information

### A simple hydrothermal synthesis of oxygen vacancy-rich MnMoO<sub>4</sub> rod-like materials and its highly efficient electrocatalytic nitrogen reduction

Huhu Yin<sup>a</sup>, Xiujing Xing<sup>b</sup>, Wei Zhang<sup>a</sup>, Jin Li<sup>a</sup>, Wei Xiong<sup>a,\*</sup>, and Hao Li<sup>c,\*</sup>

<sup>a</sup> Key Laboratory of Novel Biomass-Based Environmental and Energy Materials in Petroleum and Chemical Industry, Hubei Key Laboratory of Novel Reactor & Green Chemical Technology, School of Chemistry and Environmental Engineering, Wuhan Institute of Technology, Wuhan 430205, China

<sup>b</sup> Chemistry Department, University of California, Davis 95616 United States

<sup>c</sup> Advanced Institute for Materials Research (WPI-AIMR), Tohoku University, Sendai 980-8577, Japan

---

\*Corresponding authors

E-mail address: xiongwei@wit.edu.cn (W. X.); li.hao.b8@tohoku.ac.jp (H. L.)

Tel/Fax: +86-27-87195001; +81-080-9363-8256

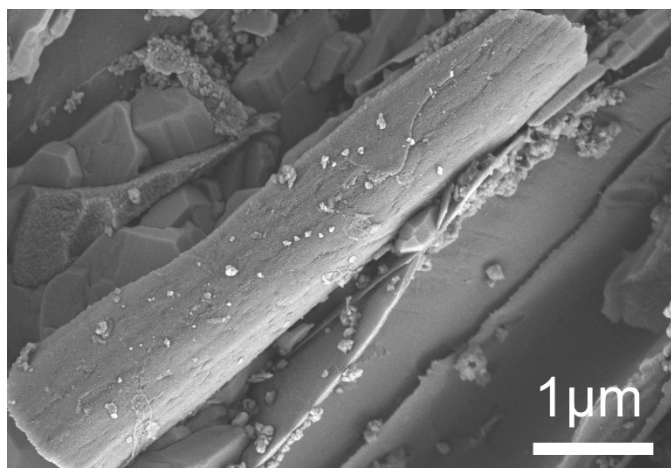

**Figure S1.** SEM image of MMN-500 after stability test.

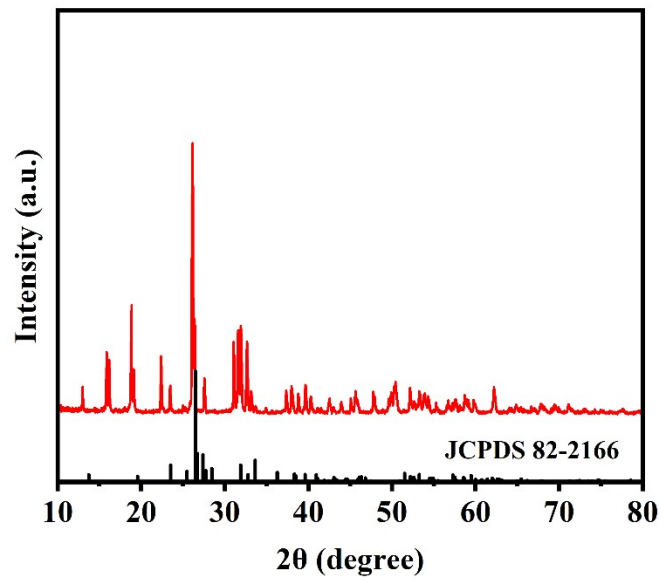

**Figure S2.** XRD pattern of MMN-500 after stability test.

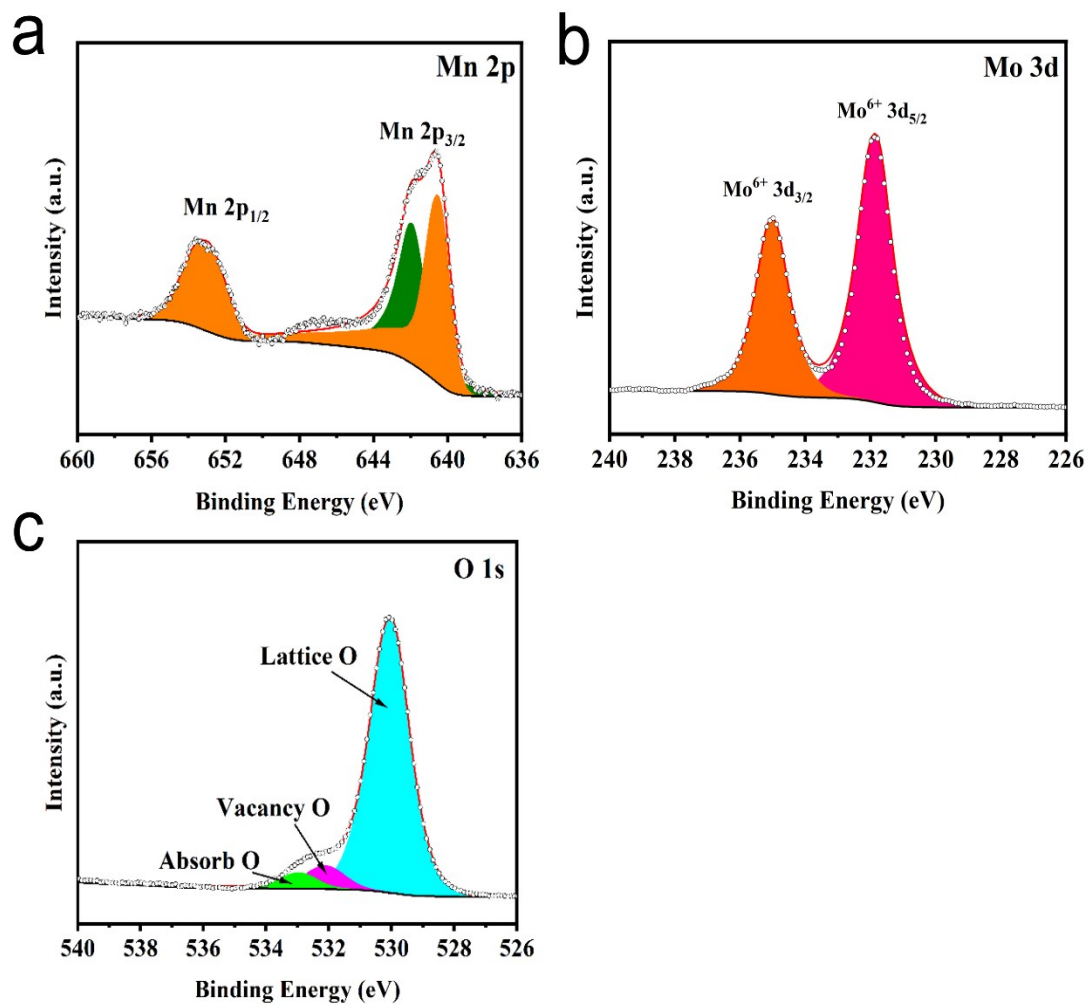

**Figure S3.** XPS spectra of MMN-500 after stability test: (a) Mn 2p, (b) Mo 3d, and (c) O 1s.
